# Supplementary material for: Nodes With the Highest Control Power Play an Important Role at the Final Level of Cooperation in Directed Networks
Source: Research Square preprint supplement (doi:10.21203/rs.3.rs-263967/v1), 2021-03-01
Supplement: Supplementary file 1 [file 9a95ec3e10f7d9496ee37c5b.docx]

**Supplementary Material**

**Nodes with the highest control power play an important role at the final level of cooperation in directed networks**

**Ali Ebrahimi1, Marzieh Yousefi2, Farhad Shahbazi2, Ali Masoudi-Nejad1***

1. Laboratory of Systems Biology and Bioinformatics (LBB), Institute of Biochemistry and Biophysics, University of Tehran, Tehran, Iran
2. Department of physics, Isfahan University of Technology (IUT), Isfahan, Iran

***Corresponding Author**

Ali Masoudi-Nejad, Ph.D,

Laboratory of Systems Biology and Bioinformatics (LBB)

Institute of Biochemistry and Biophysics

University of Tehran, Tehran, Iran.

E-mail: [amasoudin@ut.ac.ir](mailto:amasoudin@ut.ac.ir)

WWW: <http://LBB.ut.ac.ir>

**
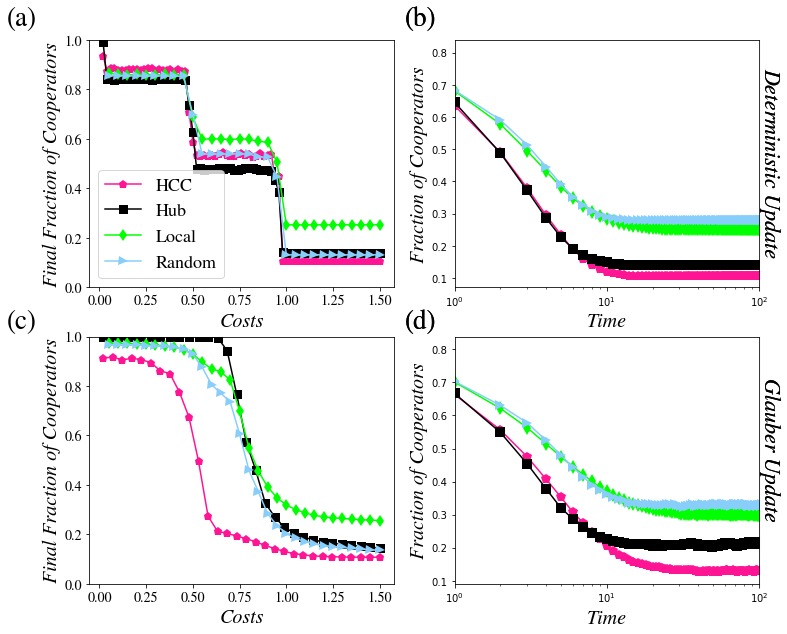
**

**Fig S1.** Results regarding the s208 network. **a)** Analysis of cooperation level based on the deterministic update rule. **b)** Network dynamics in achieving steady state relevant to the deterministic update law (c=1). **c)** Analysis of cooperation level based on the Glauber update rule. **d)** Network dynamics in achieving steady state related to the Glauber update rule (c=1)

**
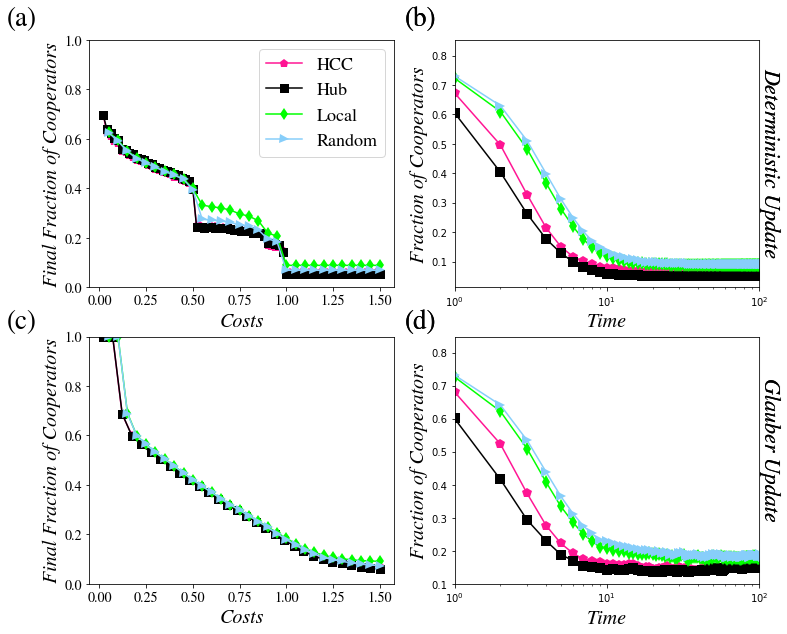
**

**Fig S2.** Results regarding the Mangrove network. Designations are as Fig S1.
